# Supplementary material for: Vacancy mediated Z-scheme charge transfer in a 2D/2D La2Ti2O7/g-C3N4 nanojunction as a bifunctional photocatalyst for solar-to-energy conversion
Source: Royal Society of Chemistry journal article supplement (doi:10.1039/d0ta01310b), 2020-01-01
Supplement: d0ta01310b1.pdf [file d0ta01310b1.pdf]

**Electronic Supplementary Information (ESI)**

**Vacancies mediated Z-scheme charge transfer in 2D/2D  
La<sub>2</sub>Ti<sub>2</sub>O<sub>7</sub>/g-C<sub>3</sub>N<sub>4</sub> nanojunction as bifunctional photocatalysts  
for solar-to-energy conversion**

Kai Wang,<sup>a,b</sup> Lisha Jiang,<sup>a</sup> Xiaoyong Wu<sup>a</sup> and Gaoke Zhang\*<sup>a</sup>

<sup>a</sup> State Key Laboratory of Silicate Materials for Architectures, School of Resources and Environmental Engineering, Wuhan University of Technology, 122 Luoshi Road, Wuhan 430070, China

<sup>b</sup> College of Urban and Environmental Sciences, Hubei Normal University, 11 Cihu Road, Huangshi 435002, China

\*Corresponding author

E-mail: gkzhang@whut.edu.cn

## **Experimental**

### **Preparation of catalysts**

Oxygen vacancy  $\text{La}_2\text{Ti}_2\text{O}_7$  nanosheets (OVLTO) were prepared by a hydrothermal assisted solid-state reaction. The pristine  $\text{La}_2\text{Ti}_2\text{O}_7$  nanosheets were prepared by a hydrothermal method. 2 g of as-prepared  $\text{La}_2\text{Ti}_2\text{O}_7$  powder and 0.5 g of  $\text{NaBH}_4$  were mixed in an agate mortar and heated to 400 °C under Ar atmosphere at a heating rate of 10 °C  $\text{min}^{-1}$ , and then held at the 400 °C for 2 h. Finally, the colored LTO sample was obtained by simply washing for several times and dried at 80 °C. g- $\text{C}_3\text{N}_4$  was prepared by heating melamine to 550 °C for 4 h. 500 mg of bulk g- $\text{C}_3\text{N}_4$  powder was ultrasonically exfoliated into thin nanosheets in 350 mL of water mixed ethyl alcohol for 40 h. To this dispersion, amounts of OVLTO nanosheets was added and then stirred at room temperature for 16 h assisted by 6 h of ultrasonication. OVLTO/CN composites were collected and dried at 60 °C. Nanocomposites with x % (weight ratio) loaded ODLTO were denoted as OVLTO-x/CN.

### **Characterization**

The crystallinity of samples was analyzed by powder X-ray diffraction (XRD) on X'Pert Pro with Cu  $K\alpha$  radiation. The absorption edges and photoluminescence (PL) spectra of samples were tested by a Shimadzu UV 3600 Plus and Shimadzu, RF-5301. The morphologies and high angle angular dark field-scanning transmission electron microscopy (HAADF-STEM) images of the sample were examined by transmission electron microscopy (JEM-2100F and Talos 200s). X-ray photoelectron spectra (Thermo Multi-lab 2000) were recorded on a spectrometer and the C 1s binding energy of adventitious carbon was 284.8 eV. Time-resolved transient PL decay

measurements were carried out by Edinburgh Instruments FLSP920. The excitation wavelength of PL analysis is 312 nm and the emission wavelength of TRPL analysis is 400 nm. Photo electrochemical analysis were tested by an electrochemical workstation (CHI660E) in a typical three-electrode system and the electrolyte was 0.5 M Na<sub>2</sub>SO<sub>4</sub>.

### **Photocatalytic H<sub>2</sub> evolution and CO<sub>2</sub> reduction**

The photocatalytic hydrogen evolution experiments were taken in a 435 mL sealed quartz three-necked Pyrex flask. Four blue LED (4\*3 W, 420 nm) served as the visible-light source. Cocatalyst Pt particles was loaded on serial photocatalysts by the photoreduction method: H<sub>2</sub>PtCl<sub>6</sub> aqueous solution was added dropwise into the reactor and was reduced into Pt nanoparticles by irradiating the solution. In a typical progress, 50 mg of photocatalyst was dispersed in 100 mL of TEOA solution (10 vol%) solution. The system was deaerated by N<sub>2</sub> bubbling into the dispersion for 15 minutes to remove the dissolved oxygen in tube. 200 μL of gas was sampled at regular intervals (1 h) through the septum, and gas component was analyzed by a gas chromatograph (GC-2014C, Shimadzu, with Ar as a carrier gas,) equipped with a 5 Å molecular-sieve column and a thermal-conductivity detector. The photocatalytic CO<sub>2</sub> reduction was carried out in a glass vessel with a quartz glass top (Perfectlight, China). The Petri dish with 20 mg catalyst was put on the bottom of vessel. The high-purity CO<sub>2</sub> was used as CO<sub>2</sub> source. Each set of experiment was irradiated by 300 W Xe lamp with 420 nm filter. Furthermore, the gas products were qualitatively analyzed by gas chromatography (GC-7820, Zhongkehuifen) through observing and comparing

the chromatographic peaks with those for the authentic CH<sub>3</sub>OH, CH<sub>4</sub>, CO. The *in-situ* FT-IR experiment was performed on a Bruke Tensor II FT-IR spectrometer. Firstly, we dropped 50 μL H<sub>2</sub>O on the surface of as-prepared samples. Then, the samples were sealed in the specimen chamber. After that, the pure CO<sub>2</sub> was followed into the specimen chamber. and the infrared absorbance spectra were recorded simultaneously. After 30 min later, the specimen chamber loaded with the samples was irradiated from the SiO<sub>2</sub> window with a Xe lamp for another 1 h.

The AQY of CO<sub>2</sub> reduction reaction was measured using LED lamp (420 nm) as light source. The irradiation area was 1 cm<sup>2</sup>. The light intensity was 4μW cm<sup>-2</sup>. The AQY was calculated as  $AQY = N_e/N_p * 100\% = (6M_1 + 2M_2)N_Ahc / (SEt\lambda) * 100\%$ . ( $N_e$ , the number of generated electrons;  $N_p$ , the number of photons;  $M_1$  and  $M_2$ , the generated CH<sub>3</sub>OH and CO molecules, respectively;  $N_A$ , the Avogadro constant;  $h$ , the Planck constant;  $c$ , the speed of light;  $S$ , the irradiation area;  $E$ , the light intensity;  $t$ , the reaction time;  $\lambda$ , the wavelength)

### **Photocatalytic H<sub>2</sub> evolution and CO<sub>2</sub> reduction**

The photocatalytic hydrogen evolution experiments were taken in a 435 mL sealed quartz three-necked Pyrex flask. Four blue LED (4\*3 W, 420 nm) served as the visible-light source. Cocatalyst Pt particles was loaded on serial photocatalysts by the photoreduction method: H<sub>2</sub>PtCl<sub>6</sub> aqueous solution

### **DFT computational details**

Vienna ab initio simulation package (VASP) calculation based on density functional theory (DFT) was used to calculate the electronic structure of perfect

$\text{La}_2\text{Ti}_2\text{O}_7$  unit cell,  $\text{La}_2\text{Ti}_2\text{O}_7$  with surface oxygen vacancy and single layer g- $\text{C}_3\text{N}_4$  and charge difference distribution of oxygen defective  $\text{La}_2\text{Ti}_2\text{O}_7/\text{g-C}_3\text{N}_4$  composite. The exchange-correction function was measured by the Perdew-Burke-Ernzerhof formulation of the generalized gradient approximation. The cutoff energy of atomic wave functions was 400 eV and the k-points  $4\times 4\times 3$  and  $3\times 3\times 3$  are performed in the calculations of two types  $\text{La}_2\text{Ti}_2\text{O}_7$  and g- $\text{C}_3\text{N}_4$ , respectively. Besides, work functions of  $\text{La}_2\text{Ti}_2\text{O}_7$  with surface oxygen vacancy and monolayer g- $\text{C}_3\text{N}_4$  calculations in this work were performed by CASTEP code. The ultrasoft pseudopotential was used to investigate the interaction between the ionic core and valence electrons. In addition, the convergence criteria of geometric optimization were synergically achieved by the convergence thresholds of  $1.0\times 10^{-5}$  eV/atom for total energy, 0.03 eV/Å for maximum force, 0.05 GPa for maximum stress, and 0.001 Å for maximum displacement.

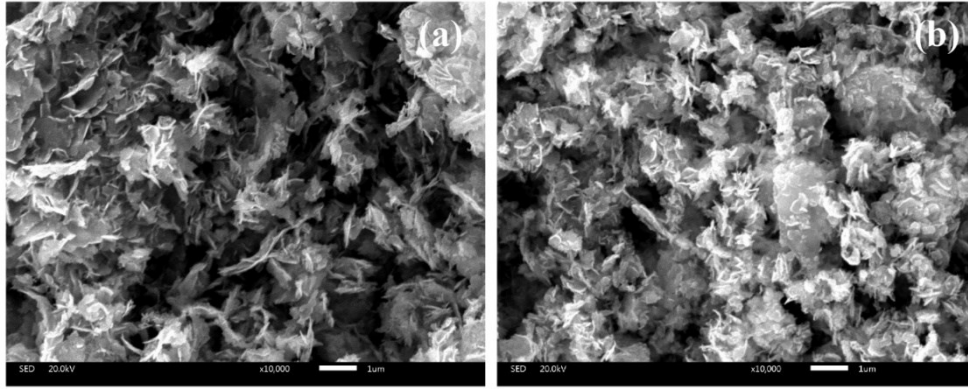

**Fig. S1.** SEM images of (a) LTO and (b) OVLTO.

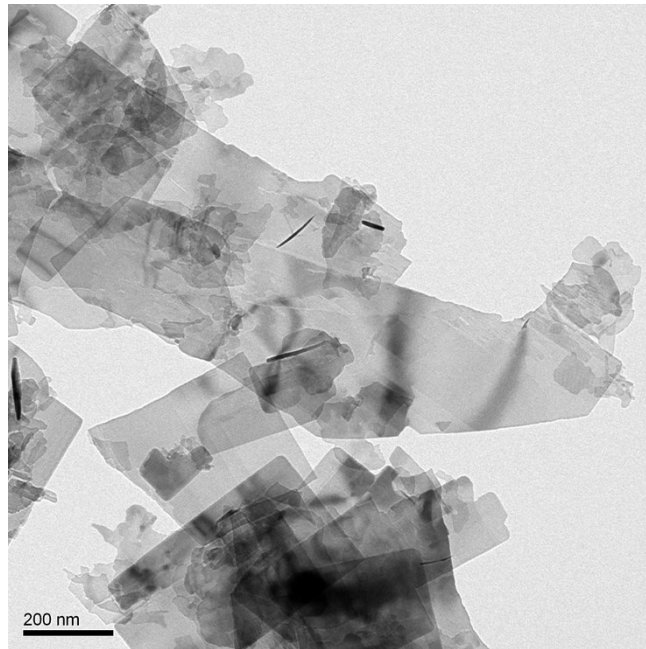

**Fig. S2.** TEM image of LTO nanosheets.

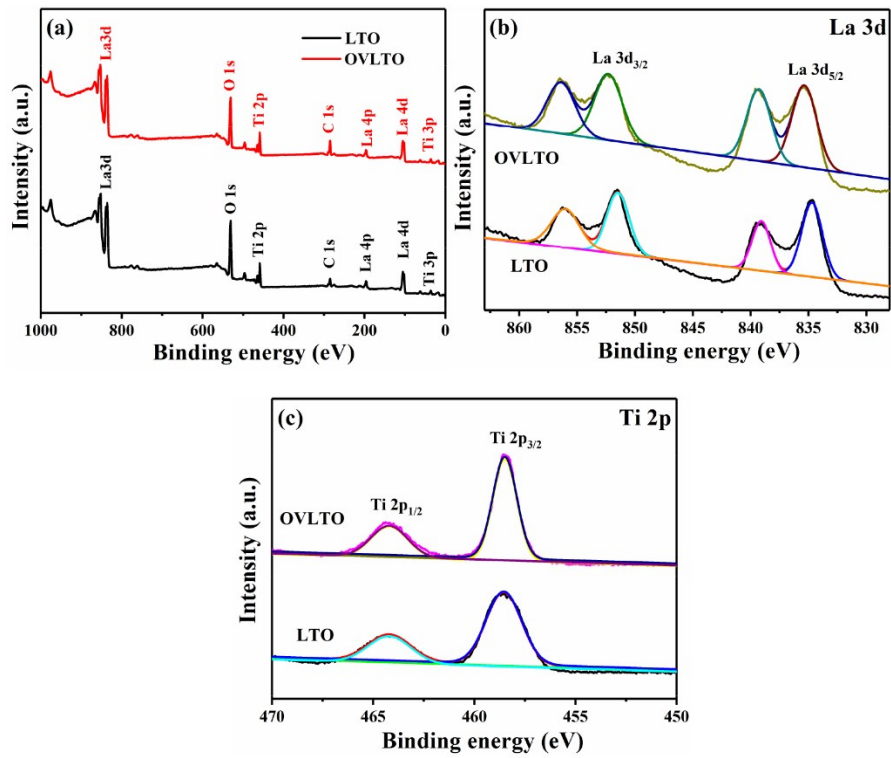

**Fig. S3.** (a) XPS Survey spectra, (b) La 3d spectra and (c) Ti 2p spectra of LTO and OVLTO.

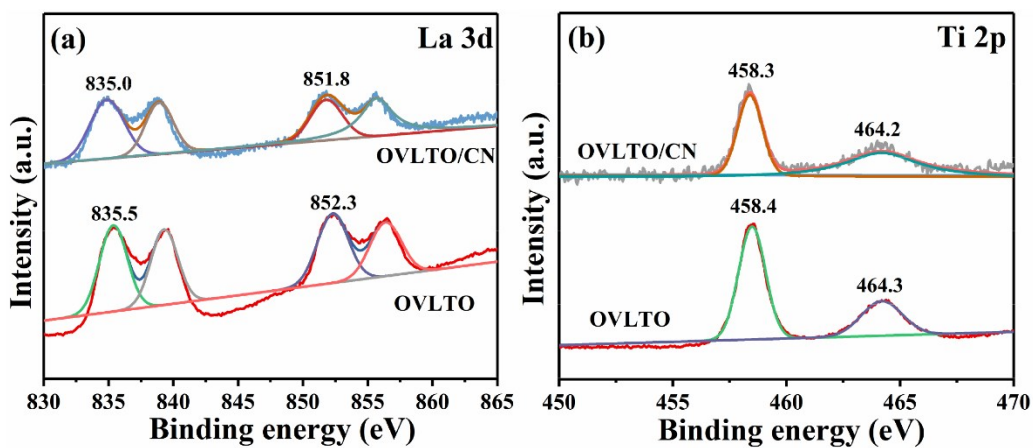

**Fig. S4.** (a) XPS La 3d spectra and (b) Ti 2p spectra of OVLTO and OVLTO/CN.

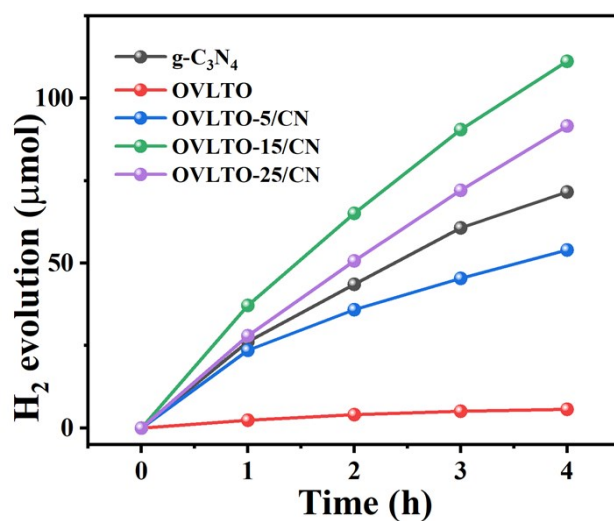

**Fig. S5.** Time course of H<sub>2</sub> evolution over different samples with CH<sub>3</sub>OH as sacrificial agent.



**Table S1** Summary of the photocatalytic hydrogen evolution of g-C<sub>3</sub>N<sub>4</sub> based catalysts.

| Catalysts                                                                         | Light source | Incident light     | H <sub>2</sub> rate ( $\mu\text{mol g}^{-1}\text{h}^{-1}$ ) | AQY                    | (Ref)     |
|-----------------------------------------------------------------------------------|--------------|--------------------|-------------------------------------------------------------|------------------------|-----------|
| g-C <sub>3</sub> N <sub>4</sub> /Bi <sub>4</sub> NbO <sub>8</sub> Cl              | Xe lamp      | $\lambda > 420$ nm | 287.71                                                      | 2.02%, 420 nm          | 58        |
| FeP/g-C <sub>3</sub> N <sub>4</sub>                                               | Xe lamp      | $\lambda > 420$ nm | 177.9                                                       | 1.57%, 420 nm          | 52        |
| CoTiO <sub>3</sub> /g-C <sub>3</sub> N <sub>4</sub>                               | Xe lamp      | $\lambda > 420$ nm | 858                                                         | 3.23%, 420 $\pm$ 20 nm | 39        |
| g-C <sub>3</sub> N <sub>4</sub> /TiO <sub>2</sub>                                 | Xe lamp      | $\lambda > 420$ nm | 513                                                         | 0.31%, 420 nm          | 6         |
| g-C <sub>3</sub> N <sub>4</sub> /N-La <sub>2</sub> Ti <sub>2</sub> O <sub>7</sub> | Xe lamp      | $\lambda > 400$ nm | 430                                                         | 2.1%, 400 nm           | 20        |
| Modified g-C <sub>3</sub> N <sub>4</sub>                                          | Xe lamp      | $\lambda > 420$ nm | 661                                                         | 2.88%, 420 $\pm$ 20 nm | 54        |
| g-C <sub>3</sub> N <sub>4</sub> -Py                                               | Xe lamp      | $\lambda > 420$ nm | 398                                                         | 1.18%, 420 nm          | 53        |
| OVLTO/CN                                                                          | LED lamp     | $\lambda = 420$ nm | 1485                                                        | 3.61%, 420 nm          | This work |

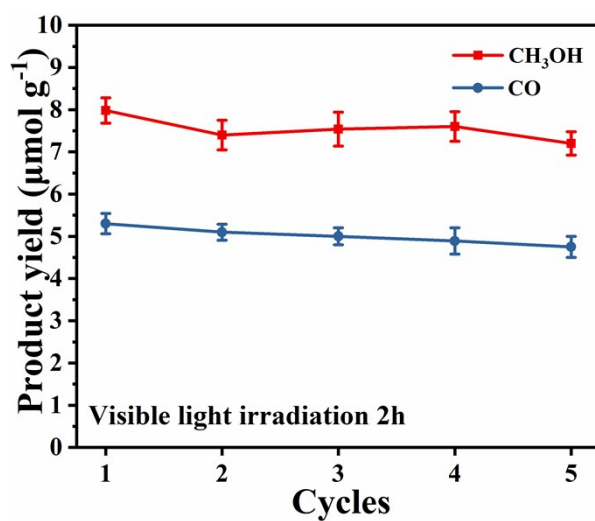

**Fig. S6.** Photostability test of OVLTO-15/CN sample under visible light irradiation.

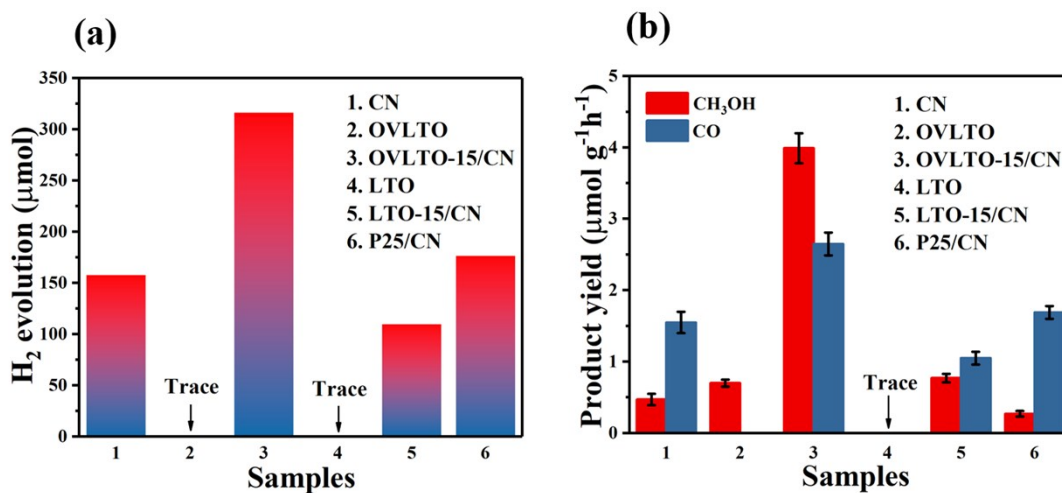

Fig. S7 Photocatalytic (a) H<sub>2</sub> generation and (b) CO<sub>2</sub> reduction over different catalysts.

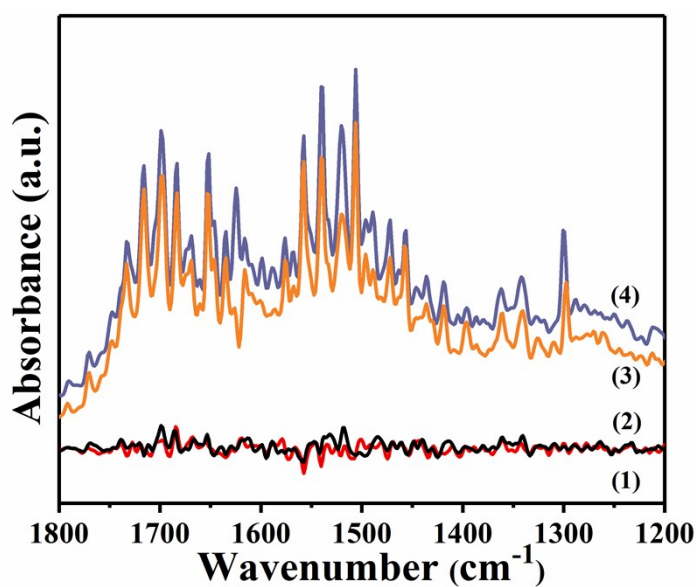

Fig. S8. The *in situ* FTIR spectra of the OVLTO-15/CN sample in different wavenumber ranges: (1) without CO<sub>2</sub> gas, (2) with flowing CO<sub>2</sub> gas for 30 min without irradiation, and (3) irradiation for 15 min and (4) 30 min.

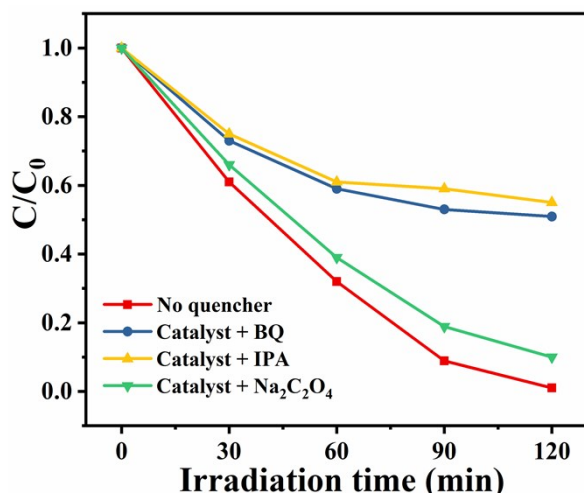

**Fig. S9.** Photocatalytic degradation of dye over OVLTO-15/CN with different scavengers.

**Table S2** PL lifetime  $\tau_i$  and corresponding constant Rel. %.

| Sample   | $\tau_1$ (Rel.%) | $\tau_2$ (Rel.%) | $\langle\tau\rangle$ |
|----------|------------------|------------------|----------------------|
| CN       | 2.3 ns (48)      | 9.6 ns (52)      | 8.28 ns              |
| OVLTO/CN | 2.6 ns (45)      | 10.5 ns (55)     | 8.96 ns              |

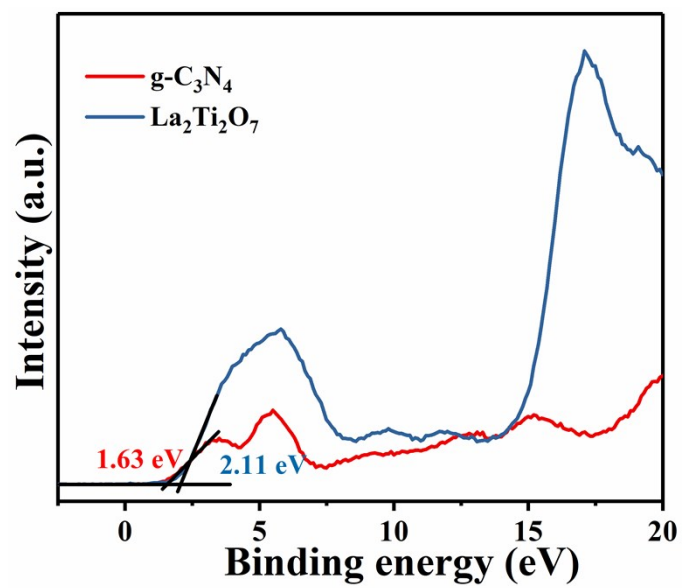

**Fig. S10.** VB-XPS spectra of g-C<sub>3</sub>N<sub>4</sub> and OVLTO sample.
